# Supplementary material for: Increased risk of congenital malformations in offspring born to women with systemic lupus erythematosus in South Korea: a nationwide population-based study
Source: PubMed Central journal article supplement — RMD Open. 2023 Jun 2;9(2):e002916. doi: 10.1136/rmdopen-2022-002916 (PMC10255274; doi:10.1136/rmdopen-2022-002916), 2023-06-02
Supplement: rmdopen-2022-002916supp001.pdf [file rmdopen-2022-002916supp001.pdf]

**Supplementary table 1. Characteristics and pregnancy outcomes based on the presence or absence of congenital malformations**

| Characteristics                     | Congenital                          | Congenital                        | P-value |
|-------------------------------------|-------------------------------------|-----------------------------------|---------|
|                                     | malformation (-)<br>(N = 2,885,724) | malformation (+)<br>(N = 393,480) |         |
| Age (years)                         | 30.85 ± 3.88                        | 31.03 ± 3.78                      | <0.0001 |
| Nulliparity                         | 1,503,036 (52.08)                   | 226,266 (57.50)                   | <0.0001 |
| <b>Comorbidity before pregnancy</b> |                                     |                                   |         |
| Hypertension                        | 91768 (3.18)                        | 15290 (3.85)                      | <0.0001 |
| Diabetes                            | 134818 (4.67)                       | 22773 (5.78)                      | <0.0001 |
| <b>Pregnancy outcomes</b>           |                                     |                                   |         |
| Gestational diabetes                | 115026 (3.98)                       | 21481 (5.45)                      | <0.0001 |
| Preeclampsia                        | 50008 (1.73)                        | 10986 (2.79)                      | <0.0001 |
| Preterm birth                       | 60011 (2.07)                        | 25352 (6.44)                      | <0.0001 |
| Cesarean section                    | 1029800 (35.68)                     | 153916 (39.11)                    | <0.0001 |
| Placental abruption                 | 9291 (0.32)                         | 2309 (0.58)                       | <0.0001 |
| Placenta Previa                     | 29786 (1.03)                        | 5940 (1.50)                       | <0.0001 |
| <b>Neonatal outcomes</b>            |                                     |                                   |         |
| Neonatal sex, male                  | 1466214 (50.80)                     | 223442 (56.78)                    | <0.0001 |
| Mean birth weight (kilogram)        | 3.22 ± 0.44                         | 3.14 ± 0.55                       | <0.0001 |
| Low birth weight                    | 86168 (2.98)                        | 29894 (7.59)                      | <0.0001 |
| Large for gestational age           | 110157 (3.81)                       | 14546 (3.69)                      | 0.0002  |

Data are presented as number (%) or mean ± SD

Supplementary table 2. Analysis of specific organ malformations

|                                                                                    | Non-maternal SLE<br>(n = 3,275,251) | Maternal SLE<br>(n = 3,953) | unadjusted OR<br>(95% CI) | adjusted OR§<br>(95% CI) |
|------------------------------------------------------------------------------------|-------------------------------------|-----------------------------|---------------------------|--------------------------|
| <b>Total congenital malformation</b>                                               | 392803 (11.99)                      | 677 (17.13)                 | 1.51 (1.39–1.64)          | 1.40 (1.28–1.52)         |
| <b>Q00-07 (Congenital malformations of the nervous system)</b>                     | 7148 (0.22)                         | 18 (0.46)                   | 2.09 (1.31–3.33)          | 1.90 (1.20–3.03)         |
| <b>Q00 (Anencephaly and similar malformations)</b>                                 | 3 (0.00)                            | 0 (0.00)                    | -                         | -                        |
| <b>Q01 (Encephalocele)</b>                                                         | 137 (0.00)                          | 0 (0.00)                    | -                         | -                        |
| <b>Q02 (Microcephaly)</b>                                                          | 888 (0.03)                          | 2 (0.05)                    | 1.87 (0.47–7.48)          | 1.65 (0.41–6.60)         |
| <b>Q03 (Congenital hydrocephalus)</b>                                              | 682 (0.02)                          | 3 (0.08)                    | 3.63 (1.16–11.35)         | 3.18 (1.01–10.05)        |
| <b>Q04 (Other congenital malformations of the brain)</b>                           | 1796 (0.05)                         | 6 (0.15)                    | 2.77 (1.24–6.18)          | 2.53 (1.13–5.66)         |
| <b>Q05 (Spina bifida)</b>                                                          | 2150 (0.07)                         | 6 (0.15)                    | 2.31 (1.04–5.17)          | 2.18 (0.97–4.87)         |
| <b>Q06 (Other congenital malformations of the spinal cord)</b>                     | 1121 (0.03)                         | 1 (0.03)                    | 0.74 (0.10–5.25)          | 0.65 (0.09–4.62)         |
| <b>Q07 (Other congenital malformations of the nervous system)</b>                  | 371 (0.01)                          | 0 (0.00)                    | -                         | -                        |
| <b>Q10-Q18 (Congenital malformations of the eye, ear, face, and neck)</b>          | 44623 (1.30)                        | 78 (1.97)                   | 1.45 (1.16–1.82)          | 1.37 (1.09–1.71)         |
| <b>Q10 (Congenital malformations of the eyelid, lacrimal apparatus, and orbit)</b> | 32760 (1.00)                        | 57 (1.44)                   | 1.45 (1.11–1.88)          | 1.35 (1.04–1.76)         |
| <b>Q11 (Anophthalmos, microphthalmos, and macrophthalmos)</b>                      | 98 (0.00)                           | 0 (0.00)                    | -                         | -                        |
| <b>Q12 (Congenital lens malformations)</b>                                         | 523 (0.02)                          | 0 (0.00)                    | -                         | -                        |
| <b>Q13 (Congenital malformations of the anterior segment of the eye)</b>           | 436 (0.01)                          | 0 (0.00)                    | -                         | -                        |
| <b>Q14 (Congenital malformations of the posterior segment of the eye)</b>          | 258 (0.01)                          | 1 (0.03)                    | 3.24 (0.46–22.92)         | 3.04 (0.43–21.73)        |
| <b>Q15 (Other congenital malformations of the eye)</b>                             | 345 (0.01)                          | 0 (0.00)                    | -                         | -                        |
| <b>Q16 (Congenital malformations of the ear causing impairment of hearing)</b>     | 1038 (0.03)                         | 4 (0.10)                    | 3.20 (1.20–8.53)          | 3.01 (1.13–8.09)         |
| <b>Q17 (Other congenital malformations of the ear)</b>                             | 4625 (0.14)                         | 9 (0.23)                    | 1.61 (0.84–3.11)          | 1.47 (0.76–2.83)         |
| <b>Q18 (Other congenital malformations of the face and neck)</b>                   | 4540 (0.14)                         | 7 (0.18)                    | 1.28 (0.61–2.68)          | 1.28 (0.61–2.69)         |
| <b>Q20-Q28 (Congenital malformations of the circulatory system)</b>                | 84968 (2.59)                        | 216 (5.46)                  | 2.17 (1.89–2.49)          | 1.92 (1.67–2.20)         |
| <b>Q20 (Congenital malformations of the cardiac chambers and connections)</b>      | 647 (0.02)                          | 1 (0.03)                    | 1.28 (0.18–9.11)          | 1.23 (0.18–8.68)         |
| <b>Q21 (Congenital malformations of the cardiac septa)</b>                         | 54917 (1.68)                        | 149 (3.77)                  | 2.30 (1.95–2.70)          | 2.05 (1.74–2.41)         |
| <b>Q22 (Congenital malformations of pulmonary and tricuspid valves)</b>            | 2133 (0.07)                         | 4 (0.10)                    | 1.56 (0.59–4.16)          | 1.45 (0.54–3.88)         |
| <b>Q23 (Congenital malformations of the aortic and mitral valves)</b>              | 506 (0.02)                          | 1 (0.03)                    | 1.64 (0.23–11.65)         | 1.44 (0.20–10.17)        |
| <b>Q24 (Other congenital malformations of the heart)</b>                           | 7524 (0.23)                         | 11 (0.28)                   | 1.21 (0.67–2.19)          | 1.17 (0.64–2.11)         |
| <b>Q25 (Congenital malformations of the great arteries)</b>                        | 16651 (0.51)                        | 45 (1.14)                   | 2.25 (1.69–3.02)          | 1.84 (1.37–2.48)         |
| <b>Q26 (Congenital malformations of great veins)</b>                               | 280 (0.01)                          | 1 (0.03)                    | 2.96 (0.42–21.09)         | 3.26 (0.46–23.06)        |

|                                                                                                            |               |            |                   |                   |
|------------------------------------------------------------------------------------------------------------|---------------|------------|-------------------|-------------------|
| <b>Q27 (Other congenital malformations of the peripheral vascular system)</b>                              | 2064 (0.06)   | 4 (0.10)   | 1.61 (0.60–4.29)  | 1.43 (0.54–3.82)  |
| <b>Q28 (Other congenital malformations of the circulatory system)</b>                                      | 246 (0.01)    | 0 (0.00)   | -                 | -                 |
| <b>Q30-Q34 (Congenital malformations of the respiratory system)</b>                                        | 8785 (0.27)   | 11 (0.28%) | 1.04 (0.57–1.88)  | 1.02 (0.57–1.85)  |
| <b>Q30 (Congenital malformations of the nose)</b>                                                          | 172 (0.01)    | 1 (0.03%)  | 4.82 (0.68–34.41) | 4.80 (0.66–34.98) |
| <b>Q31 (Congenital malformations of the larynx)</b>                                                        | 6608 (0.20)   | 6 (0.15%)  | 0.75 (0.34–1.68)  | 0.75 (0.34–1.67)  |
| <b>Q32 (Congenital malformations of the trachea and bronchus)</b>                                          | 800 (0.02)    | 2 (0.05%)  | 2.08 (0.52–8.31)  | 2.11 (0.53–8.51)  |
| <b>Q33 (Congenital malformations of the lung)</b>                                                          | 1124 (0.03)   | 2 (0.05%)  | 1.47 (0.37–5.89)  | 1.35 (0.34–5.42)  |
| <b>Q34 (Other congenital malformations of the respiratory system)</b>                                      | 81 (0.00%)    | 0 (0%)     | -                 | -                 |
| <b>Q35-Q37 (Cleft lip and cleft palate)</b>                                                                | 3840 (0.12)   | 6 (0.15)   | 1.29 (0.58–2.88)  | 1.19 (0.53–2.67)  |
| <b>Q35 (Congenital malformations of cardiac chambers and connections)</b>                                  | 2174 (0.07)   | 3 (0.08)   | 1.12 (0.36–3.52)  | 1.07 (0.34–3.36)  |
| <b>Q36 (Congenital malformations of cardiac septa)</b>                                                     | 1173 (0.04)   | 3 (0.08)   | 2.13 (0.69–6.60)  | 1.93 (0.62–6.00)  |
| <b>Q37 (Congenital malformations of pulmonary and tricuspid valves)</b>                                    | 493 (0.02)    | 0 (0.00)   | -                 | -                 |
| <b>Q38-Q45 (Other congenital malformations of the digestive system)</b>                                    | 116272 (3.55) | 155 (3.92) | 1.12 (0.96–1.32)  | 1.08 (0.92–1.26)  |
| <b>Q38 (Other congenital malformations of the tongue, mouth, and pharynx)</b>                              | 103441 (3.16) | 137 (3.47) | 1.12 (0.94–1.33)  | 1.07 (0.90–1.27)  |
| <b>Q39 (Congenital malformations of the esophagus)</b>                                                     | 402 (0.01)    | 0 (0.00)   | -                 | -                 |
| <b>Q40 (Other congenital malformations of the upper alimentary tract)</b>                                  | 6077 (0.19)   | 8 (0.20)   | 1.09 (0.55–2.18)  | 1.04 (0.52–2.08)  |
| <b>Q41 (Congenital absence, atresia, and stenosis of the small intestine)</b>                              | 688 (0.02)    | 2 (0.05)   | 2.41 (0.60–9.66)  | 2.34 (0.58–9.41)  |
| <b>Q42 (Congenital absence, atresia, and stenosis of the large intestine)</b>                              | 978 (0.03)    | 2 (0.05)   | 1.70 (0.43–6.79)  | 1.62 (0.41–6.47)  |
| <b>Q43 (Other congenital malformations of the intestine)</b>                                               | 3675 (0.11)   | 5 (0.13)   | 1.13 (0.47–2.71)  | 1.10 (0.45–2.64)  |
| <b>Q44 (Congenital malformations of the gallbladder, bile ducts, and liver)</b>                            | 889 (0.03)    | 1 (0.03)   | 0.93 (0.13–6.63)  | 0.95 (0.13–6.78)  |
| <b>Q45 (Other congenital malformations of digestive system)</b>                                            | 122 (0.00)    | 0 (0.00)   | -                 | -                 |
| <b>Q50-Q56 (Congenital malformations of the genital organs)</b>                                            | 24572 (0.75)  | 30 (0.76)  | 1.01 (0.71–1.45)  | 0.95 (0.66–1.36)  |
| <b>Q50 (Congenital malformations of the ovaries, fallopian tubes, and broad ligaments)</b>                 | 156 (0.00)    | 0 (0.00)   | -                 | -                 |
| <b>Q51 (Congenital malformations of the uterus and cervix)</b>                                             | 25 (0.00)     | 0 (0.00)   | -                 | -                 |
| <b>Q52 (Other congenital malformations of female genitalia)</b>                                            | 4820 (0.15)   | 4 (0.10)   | 0.69 (0.26–1.84)  | 0.65 (0.25–1.75)  |
| <b>Q53 (Undescended and ectopic testicle)</b>                                                              | 12764 (0.39)  | 17 (0.43)  | 1.11 (0.68–1.77)  | 1.05 (0.65–1.69)  |
| <b>Q54 (Hypospadias)</b>                                                                                   | 1533 (0.05)   | 1 (0.03)   | 0.54 (0.08–3.83)  | 0.46 (0.07–3.44)  |
| <b>Q55 (Other congenital malformations of the male genital organs)</b>                                     | 5034 (0.15)   | 7 (0.18)   | 1.15 (0.55–2.42)  | 1.06 (0.50–2.22)  |
| <b>Q56 (Indeterminate sex and pseudohermaphroditism)</b>                                                   | 240 (0.01)    | 1 (0.03)   | 3.47 (0.49–24.61) | 2.99 (0.42–21.54) |
| <b>Q60-Q64 (Congenital malformations of the urinary system)</b>                                            | 18315 (0.56)  | 28 (0.71)  | 1.27 (0.88–1.84)  | 1.19 (0.82–1.73)  |
| <b>Q60 (Renal agenesis and other reduction defects of the kidney)</b>                                      | 785 (0.02)    | 0 (0.00)   | -                 | -                 |
| <b>Q61 (Cystic kidney disease)</b>                                                                         | 1533 (0.05)   | 1 (0.03)   | 0.54 (0.08–3.84)  | 0.52 (0.07–3.65)  |
| <b>Q62 (Congenital obstructive defects of the renal pelvis and congenital malformations of the ureter)</b> | 13883 (0.42)  | 24 (0.61)  | 1.43 (0.96–2.14)  | 1.36 (0.91–2.04)  |

|                                                                                                        |              |            |                   |                   |
|--------------------------------------------------------------------------------------------------------|--------------|------------|-------------------|-------------------|
| <b>Q63 (Other congenital malformations of the kidney)</b>                                              | 1348 (0.04)  | 3 (0.08)   | 1.84 (0.59–5.74)  | 1.59 (0.51–4.94)  |
| <b>Q64 (Other congenital malformations of the urinary system)</b>                                      | 766 (0.02)   | 0 (0.00)   | -                 | -                 |
| <b>Q65-Q79 (Congenital malformations and deformations of the musculoskeletal system)</b>               | 72337 (2.21) | 117 (2.96) | 1.35 (1.12–1.62)  | 1.26 (1.05–1.52)  |
| <b>Q65 (Congenital deformities of the hip)</b>                                                         | 21148 (0.65) | 34 (0.86)  | 1.33 (0.95–1.87)  | 1.26 (0.90–1.77)  |
| <b>Q66 (Congenital deformities of the feet)</b>                                                        | 8445 (0.26)  | 14 (0.35)  | 1.37 (0.81–2.33)  | 1.27 (0.75–2.14)  |
| <b>Q67 (Congenital musculoskeletal deformities of the head, face, spine, and chest)</b>                | 7556 (0.23)  | 10 (0.25)  | 1.10 (0.59–2.04)  | 0.99 (0.54–1.86)  |
| <b>Q68 (Other congenital musculoskeletal deformities)</b>                                              | 13535 (0.41) | 26 (0.66)  | 1.60 (1.08–2.34)  | 1.48 (1.01–2.19)  |
| <b>Q69 (Polydactyly)</b>                                                                               | 3986 (0.12)  | 10 (0.25)  | 2.08 (1.12–3.87)  | 1.97 (1.06–3.67)  |
| <b>Q70 (Syndactyly)</b>                                                                                | 2262 (0.07)  | 3 (0.08)   | 1.09 (0.36–3.42)  | 1.09 (0.35–3.42)  |
| <b>Q71 (Reduction defects of the upper limb)</b>                                                       | 132 (0.00)   | 0 (0.00)   | -                 | -                 |
| <b>Q72 (Reduction defects of the lower limb)</b>                                                       | 452 (0.01)   | 0 (0.00)   | -                 | -                 |
| <b>Q73 (Reduction defects of the unspecified limb)</b>                                                 | 24(0%)       | 0(0%)      | -                 | -                 |
| <b>Q74 (Other congenital malformations of limb(s))</b>                                                 | 3972 (0.12)  | 7 (0.18)   | 1.46 (0.69–3.06)  | 1.41 (0.67–2.97)  |
| <b>Q75 (Other congenital malformations of the skull and face bones)</b>                                | 5606 (0.17)  | 8 (0.20)   | 1.18 (0.59–2.37)  | 1.07 (0.53–2.15)  |
| <b>Q76 (Congenital malformations of the spine and bony thorax)</b>                                     | 2512 (0.08)  | 3 (0.08)   | 0.99 (0.32–3.07)  | 0.92 (0.29–2.84)  |
| <b>Q77 (Osteochondrodysplasia with defects in growth of tubular bones and the spine)</b>               | 235 (0.01)   | 0 (0.00)   | -                 | -                 |
| <b>Q78 (Other osteochondrodysplasias)</b>                                                              | 225 (0.01)   | 0 (0.00)   | -                 | -                 |
| <b>Q79 (Congenital malformations of the musculoskeletal system, not elsewhere classified)</b>          | 2247 (0.07)  | 2 (0.05)   | 0.74 (0.19–2.95)  | 0.71 (0.18–2.85)  |
| <b>Q80-Q89 (Other congenital malformations)</b>                                                        | 11943 (0.36) | 18 (0.46)  | 1.25 (0.79–1.98)  | 1.18 (0.74–1.87)  |
| <b>Q80 (Congenital ichthyosis)</b>                                                                     | 258 (0.01)   | 1 (0.03)   | 3.22 (0.45–22.89) | 3.34 (0.46–24.30) |
| <b>Q81 (Epidermolysis bullosa)</b>                                                                     | 292 (0.01)   | 0 (0.00)   | -                 | -                 |
| <b>Q82 (Other congenital malformations of the skin)</b>                                                | 7545 (0.23)  | 13 (0.33)  | 1.43 (0.83–2.46)  | 1.34 (0.78–2.32)  |
| <b>Q83 (Congenital malformations of the breast)</b>                                                    | 291 (0.01)   | 0 (0.00)   | -                 | -                 |
| <b>Q84 (Other congenital malformations of the integument)</b>                                          | 557 (0.02)   | 1 (0.03)   | 1.49 (0.21–10.58) | 1.35 (0.19–9.67)  |
| <b>Q85 (Phakomatoses, not elsewhere classified)</b>                                                    | 1400 (0.04)  | 3 (0.08)   | 1.76 (0.56–5.51)  | 1.69 (0.54–5.28)  |
| <b>Q86 (Congenital malformation syndromes due to known exogenous causes, not elsewhere classified)</b> | 15 (0.00)    | 0 (0.00)   | -                 | -                 |
| <b>Q87 (Other specified congenital malformation syndromes affecting multiple systems)</b>              | 367 (0.01)   | 0 (0.00)   | -                 | -                 |
| <b>Q89 (Other congenital malformations, not elsewhere classified)</b>                                  | 1218 (0.04)  | 0 (0.00)   | -                 | -                 |

§ adjusted for age, parity, hypertension, diabetes, and neonatal sex.

Abbreviations: CI, Confidence interval; OR, odds ratio; SLE, Systemic lupus erythematosus

**Supplementary table 3. Characteristics and pregnancy outcomes after propensity score matching**

| Characteristics                     | Non-maternal SLE<br>(N = 19,765) | Maternal SLE<br>(N = 3,953) | P-value |
|-------------------------------------|----------------------------------|-----------------------------|---------|
| Age (year)s                         | 31.83 ± 3.70                     | 31.82 ± 3.71                | 0.9606  |
| Nulliparity                         | 11145 (56.39)                    | 2229 (56.39)                | 1       |
| <b>Comorbidity before pregnancy</b> |                                  |                             |         |
| Hypertension                        | 3725 (18.85)                     | 745 (18.85)                 | 1       |
| Diabetes                            | 2880 (14.57)                     | 577 (14.59)                 | 0.9672  |
| <b>Pregnancy outcomes</b>           |                                  |                             |         |
| Gestational diabetes                | 1166 (5.89)                      | 193 (4.88)                  | 0.0120  |
| Preeclampsia                        | 547 (2.77)                       | 139 (3.52)                  | 0.0103  |
| Preterm birth                       | 585 (2.96)                       | 268 (6.78)                  | <.0001  |
| Cesarean section                    | 7908 (40.01)                     | 1691 (42.78)                | 0.0012  |
| Placental abruption                 | 70 (0.35)                        | 28 (0.71)                   | 0.0115  |
| Placenta Previa                     | 249 (1.26)                       | 80 (2.02)                   | 0.0002  |
| <b>Neonatal outcomes</b>            |                                  |                             |         |
| Neonatal sex, male                  | 10259 (51.90)                    | 2076 (52.52)                | 0.4819  |
| Mean birth weight                   | 3.21 ± 0.47                      | 3.06 ± 0.55                 | <.0001  |
| Low birth weight                    | 796 (4.03)                       | 396 (10.02)                 | <.0001  |
| Large for gestational age           | 811 (4.10)                       | 89 (2.25)                   | <.0001  |

Data are presented as number (%) or mean ± SD

The control group was selected after matching for age, parity, hypertension, diabetes before pregnancy and year of delivery

Abbreviations: SLE, Systemic lupus erythematosus

**Supplementary table 4. Analysis of specific organ malformations after propensity score matching**

|                                                                             | Non-maternal SLE<br>(n = 19,765) | Maternal SLE<br>(n = 3,953) | unadjusted OR<br>(95% CI) | adjusted OR§<br>(95% CI) |
|-----------------------------------------------------------------------------|----------------------------------|-----------------------------|---------------------------|--------------------------|
| <b>Total congenital malformation</b>                                        | 2799 (14.16)                     | 677 (17.13)                 | 1.25 (1.14-1.37)          | 1.25 (1.14-1.37)         |
| <b>Q00-07 (Congenital malformations of the nervous system)</b>              | 53 (0.27)                        | 18 (0.46)                   | 1.70 (0.99-2.91)          | 1.71 (0.99-2.91)         |
| Q00 (Anencephaly and similar malformations)                                 | 0 (0.00)                         | 0 (0.00)                    | -                         | -                        |
| Q01 (Encephalocele)                                                         | 0 (0.00)                         | 0 (0.00)                    | -                         | -                        |
| Q02 (Microcephaly)                                                          | 8 (0.04)                         | 2 (0.05)                    | 1.25 (0.27-5.89)          | 1.26 (0.27-5.94)         |
| Q03 (Congenital hydrocephalus)                                              | 2 (0.01)                         | 3 (0.08)                    | 7.51 (1.25-44.93)         | 7.46 (1.25-44.69)        |
| Q04 (Other congenital malformations of the brain)                           | 10 (0.05)                        | 6 (0.15)                    | 3.00 (1.09-8.27)          | 3.00 (1.09-8.26)         |
| Q05 (Spina bifida)                                                          | 17 (0.09)                        | 6 (0.15)                    | 1.77 (0.70-4.48)          | 1.78 (0.70-4.51)         |
| Q06 (Other congenital malformations of the spinal cord)                     | 15 (0.08)                        | 1 (0.03)                    | 0.33 (0.04-2.52)          | 0.33 (0.04-2.52)         |
| Q07 (Other congenital malformations of the nervous system)                  | 1 (0.01)                         | 0 (0.00)                    | -                         | -                        |
| <b>Q10-Q18 (Congenital malformations of the eye, ear, face, and neck)</b>   | 284 (1.44)                       | 78 (1.97)                   | 1.38 (1.07-1.78)          | 1.38 (1.07-1.78)         |
| Q10 (Congenital malformations of the eyelid, lacrimal apparatus, and orbit) | 211 (1.07)                       | 57 (1.44)                   | 1.36 (1.01-1.82)          | 1.36 (1.01-1.82)         |
| Q11 (Anophthalmos, microphthalmos, and macrophthalmos)                      | 0 (0.00)                         | 0 (0.00)                    | -                         | -                        |
| Q12 (Congenital lens malformations)                                         | 3 (0.02)                         | 0 (0.00)                    | -                         | -                        |
| Q13 (Congenital malformations of the anterior segment of the eye)           | 3 (0.02)                         | 0 (0.00)                    | -                         | -                        |
| Q14 (Congenital malformations of the posterior segment of the eye)          | 1 (0.01)                         | 1 (0.03)                    | 5.00 (0.31-79.97)         | 5.08 (0.32-81.79)        |
| Q15 (Other congenital malformations of the eye)                             | 3 (0.02)                         | 0 (0.00)                    | -                         | -                        |
| Q16 (Congenital malformations of the ear causing impairment of hearing)     | 4 (0.02)                         | 4 (0.10)                    | 5.00 (1.25-20.02)         | 5.00 (1.25-20.02)        |
| Q17 (Other congenital malformations of the ear)                             | 32 (0.16)                        | 9 (0.23)                    | 1.41 (0.67-2.95)          | 1.40 (0.67-2.94)         |
| Q18 (Other congenital malformations of the face and neck)                   | 27 (0.14)                        | 7 (0.18)                    | 1.30 (0.56-2.98)          | 1.30 (0.56-2.99)         |
| <b>Q20-Q28 (Congenital malformations of the circulatory system)</b>         | 644 (3.26)                       | 216 (5.46)                  | 1.72 (1.47-2.01)          | 1.72 (1.47-2.02)         |
| Q20 (Congenital malformations of cardiac chambers and connections)          | 6 (0.03)                         | 1 (0.03)                    | 0.83 (0.10-6.92)          | 0.84 (0.10-7.02)         |
| Q21 (Congenital malformations of the cardiac septa)                         | 391 (1.98)                       | 149 (3.77)                  | 1.94 (1.60-2.35)          | 1.94 (1.61-2.36)         |
| Q22 (Congenital malformations of pulmonary and tricuspid valves)            | 16 (0.08)                        | 4 (0.10)                    | 1.25 (0.42-3.74)          | 1.25 (0.42-3.73)         |
| Q23 (Congenital malformations of the aortic and mitral valves)              | 0 (0.00)                         | 1 (0.03)                    | -                         | -                        |
| Q24 (Other congenital malformations of the heart)                           | 63 (0.32)                        | 11 (0.28)                   | 0.87 (0.46-1.66)          | 0.87 (0.46-1.66)         |
| Q25 (Congenital malformations of the great arteries)                        | 145 (0.73)                       | 45 (1.14)                   | 1.56 (1.11-2.18)          | 1.56 (1.12-2.19)         |
| Q26 (Congenital malformations of great veins)                               | 1 (0.01)                         | 1 (0.03)                    | 5.00 (0.31-79.97)         | 5.01 (0.31-80.15)        |
| Q27 (Other congenital malformations of the peripheral vascular system)      | 21 (0.11)                        | 4 (0.10)                    | 0.95 (0.33-2.78)          | 0.95 (0.33-2.78)         |
| Q28 (Other congenital malformations of the circulatory system)              | 1 (0.01)                         | 0 (0.00)                    | -                         | -                        |

|                                                                                                            |            |            |                   |                   |
|------------------------------------------------------------------------------------------------------------|------------|------------|-------------------|-------------------|
| <b>Q30-Q34 (Congenital malformations of the respiratory system)</b>                                        | 50 (0.25)  | 11 (0.28)  | 1.10 (0.57-2.12)  | 1.10 (0.57-2.11)  |
| <b>Q30 (Congenital malformations of the nose)</b>                                                          | 0 (0.00)   | 1 (0.03)   | -                 | -                 |
| <b>Q31 (Congenital malformations of the larynx)</b>                                                        | 36 (0.18)  | 6 (0.15)   | 0.83 (0.35-1.98)  | 0.83 (0.35-1.97)  |
| <b>Q32 (Congenital malformations of the trachea and bronchus)</b>                                          | 5 (0.03)   | 2 (0.05)   | 2.00 (0.39-10.32) | 1.99 (0.39-10.24) |
| <b>Q33 (Congenital malformations of the lung)</b>                                                          | 8 (0.04)   | 2 (0.05)   | 1.25 (0.27-5.89)  | 1.25 (0.27-5.98)  |
| <b>Q34 (Other congenital malformations of respiratory system)</b>                                          | 1 (0.01)   | 0 (0.00)   | -                 | -                 |
| <b>Q35-Q37 (Cleft lip and cleft palate)</b>                                                                | 31 (0.16)  | 6 (0.15)   | 0.97 (0.40-2.32)  | 0.97 (0.40-2.32)  |
| <b>Q35 (Congenital malformations of cardiac chambers and connections)</b>                                  | 23 (0.12)  | 3 (0.08)   | 0.65 (0.20-2.17)  | 0.65 (0.20-2.18)  |
| <b>Q36 (Congenital malformations of the cardiac septa)</b>                                                 | 7 (0.04)   | 3 (0.08)   | 2.14 (0.55-8.30)  | 2.13 (0.55-8.26)  |
| <b>Q37 (Congenital malformations of pulmonary and tricuspid valves)</b>                                    | 1 (0.01)   | 0 (0.00)   | -                 | -                 |
| <b>Q38-Q45 (Other congenital malformations of the digestive system)</b>                                    | 856 (4.33) | 155 (3.92) | 0.90 (0.76-1.07)  | 0.90 (0.75-1.07)  |
| <b>Q38 (Other congenital malformations of the tongue, mouth, and pharynx)</b>                              | 790 (4.00) | 137 (3.47) | 0.86 (0.72-1.04)  | 0.86 (0.71-1.03)  |
| <b>Q39 (Congenital malformations of the esophagus)</b>                                                     | 4 (0.02)   | 0 (0.00)   | -                 | -                 |
| <b>Q40 (Other congenital malformations of the upper alimentary tract)</b>                                  | 29 (0.15)  | 8 (0.20)   | 1.38 (0.63-3.02)  | 1.37 (0.63-3.01)  |
| <b>Q41 (Congenital absence, atresia and stenosis, of the small intestine)</b>                              | 2 (0.01)   | 2 (0.05)   | 5.00 (0.70-35.52) | 5.16 (0.73-36.66) |
| <b>Q42 (Congenital absence, atresia, and stenosis of the large intestine)</b>                              | 12 (0.06)  | 2 (0.05)   | 0.83 (0.19-3.73)  | 0.84 (0.19-3.73)  |
| <b>Q43 (Other congenital malformations of the intestine)</b>                                               | 18 (0.09)  | 5 (0.13)   | 1.39 (0.52-3.74)  | 1.39 (0.52-3.75)  |
| <b>Q44 (Congenital malformations of the gallbladder, bile ducts, and liver)</b>                            | 1 (0.01)   | 1 (0.03)   | 5.00 (0.31-79.97) | 5.01 (0.31-80.08) |
| <b>Q45 (Other congenital malformations of the digestive system)</b>                                        | 0 (0.00)   | 0 (0.00)   | -                 | -                 |
| <b>Q50-Q56 (Congenital malformations of the genital organs)</b>                                            | 160 (0.81) | 30 (0.76)  | 0.94 (0.63-1.39)  | 0.93 (0.63-1.38)  |
| <b>Q50 (Congenital malformations of the ovaries, fallopian tubes, and broad ligaments)</b>                 | 0 (0.00)   | 0 (0.00)   | -                 | -                 |
| <b>Q51 (Congenital malformations of the uterus and cervix)</b>                                             | 0 (0.00)   | 0 (0.00)   | -                 | -                 |
| <b>Q52 (Other congenital malformations of female genitalia)</b>                                            | 35 (0.18)  | 4 (0.10)   | 0.57 (0.20-1.61)  | 0.58 (0.21-1.63)  |
| <b>Q53 (Undescended and ectopic testicle)</b>                                                              | 79 (0.40)  | 17 (0.43)  | 1.08 (0.64-1.82)  | 1.06 (0.63-1.79)  |
| <b>Q54 (Hypospadias)</b>                                                                                   | 7 (0.04)   | 1 (0.03)   | 0.72 (0.09-5.81)  | 0.70 (0.09-5.71)  |
| <b>Q55 (Other congenital malformations of the male genital organs)</b>                                     | 38 (0.19)  | 7 (0.18)   | 0.92 (0.41-2.06)  | 0.99 (0.41-2.04)  |
| <b>Q56 (Indeterminate sex and pseudohermaphroditism)</b>                                                   | 1 (0.01)   | 1 (0.03)   | 5.00 (0.31-79.97) | 4.97 (0.31-79.42) |
| <b>Q60-Q64 (Congenital malformations of the urinary system)</b>                                            | 130 (0.66) | 28 (0.71)  | 1.08 (0.72-1.62)  | 1.07 (0.71-1.62)  |
| <b>Q60 (Renal agenesis and other reduction defects of the kidney)</b>                                      | 5 (0.03)   | 0 (0.00)   | -                 | -                 |
| <b>Q61 (Cystic kidney disease)</b>                                                                         | 10 (0.05)  | 1 (0.03)   | 0.50 (0.06-3.91)  | 0.50 (0.06-3.93)  |
| <b>Q62 (Congenital obstructive defects of the renal pelvis and congenital malformations of the ureter)</b> | 96 (0.49)  | 24 (0.61)  | 1.25 (0.80-1.96)  | 1.24 (0.79-1.95)  |
| <b>Q63 (Other congenital malformations of the kidney)</b>                                                  | 12 (0.06)  | 3 (0.08)   | 1.25 (0.35-4.43)  | 1.25 (0.35-4.42)  |
| <b>Q64 (Other congenital malformations of the urinary system)</b>                                          | 7 (0.04)   | 0 (0.00)   | -                 | -                 |

|                                                                                                        |            |            |                   |                   |
|--------------------------------------------------------------------------------------------------------|------------|------------|-------------------|-------------------|
| <b>Q65-Q79 (Congenital malformations and deformations of the musculoskeletal system)</b>               | 504 (2.55) | 117 (2.96) | 1.17 (0.95-1.43)  | 1.17 (0.95-1.43)  |
| <b>Q65 (Congenital deformities of the hip)</b>                                                         | 161 (0.81) | 34 (0.86)  | 1.06 (0.73-1.53)  | 1.06 (0.73-1.54)  |
| <b>Q66 (Congenital deformities of the feet)</b>                                                        | 47 (0.24)  | 14 (0.35)  | 1.49 (0.82-2.71)  | 1.49 (0.82-2.71)  |
| <b>Q67 (Congenital musculoskeletal deformities of the head, face, spine, and chest)</b>                | 61 (0.31)  | 10 (0.25)  | 0.82 (0.42-1.60)  | 0.82 (0.42-1.60)  |
| <b>Q68 (Other congenital musculoskeletal deformities)</b>                                              | 90 (0.46)  | 26 (0.66)  | 1.45 (0.93-2.24)  | 1.45 (0.93-2.24)  |
| <b>Q69 (Polydactyly)</b>                                                                               | 30 (0.15)  | 10 (0.25)  | 1.67 (0.82-3.42)  | 1.66 (0.81-3.39)  |
| <b>Q70 (Syndactyly)</b>                                                                                | 17 (0.09)  | 3 (0.08)   | 0.88 (0.26-3.01)  | 0.88 (0.26-3.00)  |
| <b>Q71 (Reduction defects of the upper limb)</b>                                                       | 0 (0.00)   | 0 (0.00)   | -                 | -                 |
| <b>Q72 (Reduction defects of the lower limb)</b>                                                       | 6 (0.03)   | 0 (0.00)   | -                 | -                 |
| <b>Q73 (Reduction defects of the unspecified limb)</b>                                                 | 0 (0.00)   | 0 (0.00)   | -                 | -                 |
| <b>Q74 (Other congenital malformations of the limb(s))</b>                                             | 21 (0.11)  | 7 (0.18)   | 1.67 (0.71-3.93)  | 1.67 (0.71-3.93)  |
| <b>Q75 (Other congenital malformations of the skull and face bones)</b>                                | 37 (0.19)  | 8 (0.20)   | 1.08 (0.50-2.32)  | 1.08 (0.50-2.32)  |
| <b>Q76 (Congenital malformations of the spine and bony thorax)</b>                                     | 16 (0.08)  | 3 (0.08)   | 0.94 (0.27-3.22)  | 0.94 (0.27-3.22)  |
| <b>Q77 (Osteochondrodysplasia with defects in growth of the tubular bones and the spine)</b>           | 0 (0.00)   | 0 (0.00)   | -                 | -                 |
| <b>Q78 (Other osteochondrodysplasias)</b>                                                              | 1 (0.01)   | 0 (0.00)   | -                 | -                 |
| <b>Q79 (Congenital malformations of the musculoskeletal system, not elsewhere classified)</b>          | 17 (0.09)  | 2 (0.05)   | 0.59 (0.14-2.55)  | 0.59 (0.14-2.55)  |
| <b>Q80-Q89 (Other congenital malformations)</b>                                                        | 87 (0.44)  | 18 (0.46)  | 1.04 (0.62-1.72)  | 1.04 (0.62-1.72)  |
| <b>Q80 (Congenital ichthyosis)</b>                                                                     | 2 (0.01)   | 1 (0.03)   | 2.50 (0.23-27.58) | 2.34 (0.21-26.43) |
| <b>Q81 (Epidermolysis bullosa)</b>                                                                     | 3 (0.02)   | 0 (0.00)   | -                 | -                 |
| <b>Q82 (Other congenital malformations of the skin)</b>                                                | 58 (0.29)  | 13 (0.33)  | 1.12 (0.61-2.05)  | 1.12 (0.61-2.05)  |
| <b>Q83 (Congenital malformations of the breast)</b>                                                    | 2 (0.01)   | 0 (0.00)   | -                 | -                 |
| <b>Q84 (Other congenital malformations of the integument)</b>                                          | 4 (0.02)   | 1 (0.03)   | 1.25 (0.14-11.19) | 1.27 (0.14-11.36) |
| <b>Q85 (Phakomatoses, not elsewhere classified)</b>                                                    | 13 (0.07)  | 3 (0.08)   | 1.15 (0.33-4.05)  | 1.16 (0.33-4.06)  |
| <b>Q86 (Congenital malformation syndromes due to known exogenous causes, not elsewhere classified)</b> | 1 (0.01)   | 0 (0.00)   | -                 | -                 |
| <b>Q87 (Other specified congenital malformation syndromes affecting multiple systems)</b>              | 0 (0.00)   | 0 (0.00)   | -                 | -                 |
| <b>Q89 (Other congenital malformations, not elsewhere classified)</b>                                  | 4 (0.02)   | 0 (0.00)   | -                 | -                 |

The control group was selected after matching for age, parity, hypertension, diabetes before pregnancy and year of delivery

§adjusted for age, parity, hypertension, diabetes, and neonatal sex.

Abbreviations: CI, Confidence interval; OR, odds ratio; SLE, Systemic lupus erythematosus



**Supplementary table 5. List of ICD-10 codes for covariates**

---

|                      |               |
|----------------------|---------------|
| Hypertension         | I10-I15       |
| Diabetes             | E10-E14       |
| Gestational diabetes | O24.4 , O24.9 |
| Preeclampsia         | O13 - 16      |
| Placental abruption  | O45           |
| Placenta Previa      | O44           |

---
